# Supplementary material for: TranCEP: Predicting the substrate class of transmembrane transport proteins using compositional, evolutionary, and positional information
Source: PLoS One. 2020 Jan 14;15(1):e0227683. doi: 10.1371/journal.pone.0227683 (PMC6959595; doi:10.1371/journal.pone.0227683)
Supplement: S1 Table — (XLSX) [file pone.0227683.s004.xlsx]

## Sheet: Table 1
Substrate class	Training dataset	Test dataset
Amino acid	70	15
Anion	60	12
Electron	60	10
Cation	260	36
Protein/mRNA	70	15
Sugar	60	12
Other	200	20
Total	780	120

## Sheet: Table 2
Method	Accuracy	MCC
TMC-TCS-PAAC	69.23± 06.1	0.63±0.122
TMC-TCS-AAC	65.13± 03.2	0.58±0.125
TMC-PAAC	63.33± 04.4	0.51±0.129
TMC-AAC	63.08± 03.6	0.50±0.092
TMC-TCS-PseAAC	63.30± 05.5	0.49±0.129
TMC-PseAAC	61.79± 02.9	0.49±0.131
PseAAC	47.69± 02.4	0.27±0.104
PAAC	45.89± 03.1	0.25±0.101
AAC	45.38± 03.3	0.22±0.099

## Sheet: Table 3
Class	Specificity	Sensitivity	Accuracy	MCC
Amino acid	98.82±00.4	80.84±05.4	96.06±01.7	0.82±0.042
Anion	99.30±00.7	47.89±19.9	93.33±01.4	0.61±0.119
Cation	86.66±02.2	79.70±04.3	81.50±03.9	0.62±0.081
Electron	96.58±03.0	63.13±11.8	92.01±01.9	0.58±0.098
Protein	97.21±01.8	52.00±08.7	90.93±03.1	0.46±0.036
Sugar	98.19±01.9	70.51±10.5	94.39±02.1	0.52±0.192
Other	83.02±03.5	67.23±19.8	76.43±06.8	0.69±0.178
Overall	69.23±06.1	0.63±0.122

## Sheet: Table 4
Actual\Predicted	Amino acid	Anion	Cation	Electron	Protein	Sugar	Other	Total
Amino acid	9	0	2	0	0	0	4	15
Anion	1	7	1	0	0	0	3	12
Cation	0	0	34	0	1	0	1	36
Electron	0	0	1	8	0	0	1	10
Protein	0	0	3	0	10	0	2	15
Sugar	0	1	0	0	0	8	3	12
Other	1	3	2	0	0	1	13	20

## Sheet: Table 5
	Specificity		Sensitivity		Accuracy		MCC
	TrSSP	TranCEP	TrSSP	TranCEP	TrSSP	TranCEP	TrSSP	TranCEP
Amino acid	82.42	98.1	93.33	60	83.33	91.75	0.49	0.66
Anion	69.05	96.3	75	58.33	69.44	90.82	0.23	0.56
Cation	74.31	89.29	75	94.44	74.44	89	0.41	0.78
Electron	91.78	100	80	80	91.11	97.8	0.5	0.88
Protein	82.42	99.07	93.33	66.67	83.33	93.68	0.49	0.75
Sugar	76.79	99.07	91.67	66.67	77.78	94.68	0.38	0.74
Other	73.13	86	60	65	71.67	80.91	0.23	0.44
Overall					78.88	74.17	0.41	0.69

## Sheet: Table 6
Encoding	MCC			TMC-X to X		TMC-TCS-X to X		TMC-TCS-X to TMC-X
X	X	TMC-X	TMC-TCS-X	Delta	Percent	Delta	Percent	Delta	Percent
AAC	0.22	0.5	0.58	0.28	1.27	0.36	1.64	0.08	0.16
PAAC	0.25	0.51	0.63	0.26	1.04	0.38	1.52	0.12	0.24
PseAAC	0.27	0.49	0.49	0.22	0.81	0.22	0.81	0	0
Average				0.25	1.04	0.32	1.32	0.07	0.13

## Sheet: Table 7
class	SeqLth	TMS	TMSLth	Postions. Num	Pstions.Seq%	TMS.Num	TMS.Interior	TMS.Exterior	non=TMS.Num	non.TMS.Close	nonTMS.far
amino	535	10	214	340	60.91	173	59	114	153	85	68
anion	632	10	199	480	68.95	180	60	119	278	98	180
cation	644	7	148	443	61.29	131	44	87	287	72	215
electron	352	3	57	281	41.59	51	17	34	124	28	96
protein	592	2	38	350	32.04	26	9	17	136	20	116
sugar	467	10	215	345	70.37	193	65	128	143	80	63
other	580	7	155	419	60.23	129	44	86	249	69	180

## Sheet: Table 8
	class	g1mean	g1sd	g2mean	g2sd	TMSvsNonTMS
1	amino	74.6111	27.2828	50.0559	21.6113	7.67264e-16
2	anion	82.164	30.3514	60.9418	26.931	1.87285e-14
3	cation	76.5129	34.4142	55.7102	28.6259	3.29983e-41
4	electron	37.6232	44.1241	41.4378	43.5592	0.0503043
5	protein	32.6615	39.8339	30.9176	35.2994	0.414113
6	sugar	84.6849	23.2705	57.2377	19.4642	6.01653e-18
7	other	67.527	38.2134	54.521	31.173	1.09203e-16

## Sheet: Table 9
	class	g1mean	g1sd	g2mean	g2sd	closeVsFar
1	amino	62.5913	24.7258	39.0758	23.0808	4.53147e-15
2	anion	72.5288	28.2806	53.8555	28.1945	1.3074e-12
3	cation	66.1975	32.4041	51.3505	28.9057	6.13312e-25
4	electron	36.67	44.0468	41.6707	43.756	0.0358166
5	protein	32.3791	39.4734	29.9621	34.5413	0.313775
6	sugar	68.8899	19.888	47.3015	20.0638	1.65694e-16
7	other	62.8436	35.3112	48.9057	30.8957	8.83152e-15

## Sheet: Table 10
	class	g1mean	g1sd	g2mean	g2sd	interiorVsExterior
1	amino	75.9229	27.5505	74.3475	27.3115	0.0075053
2	anion	82.6666	30.7001	82.2482	30.3327	0.29047
3	cation	77.1751	35.4989	76.4015	34.2205	0.0284215
4	electron	37.6875	44.5118	37.7002	44.1744	0.983312
5	protein	31.9915	40.5549	33.117	40.1034	0.278136
6	sugar	86.1644	24.5135	84.3666	22.9561	0.0112027
7	other	67.8811	38.4754	67.5053	38.3058	0.317576
